# Supplementary material for: Statin use and breast cancer survival – a Swedish nationwide study
Source: Springer Nature journal article supplement (doi:10.1186/s12885-018-5263-z), 2019-01-11

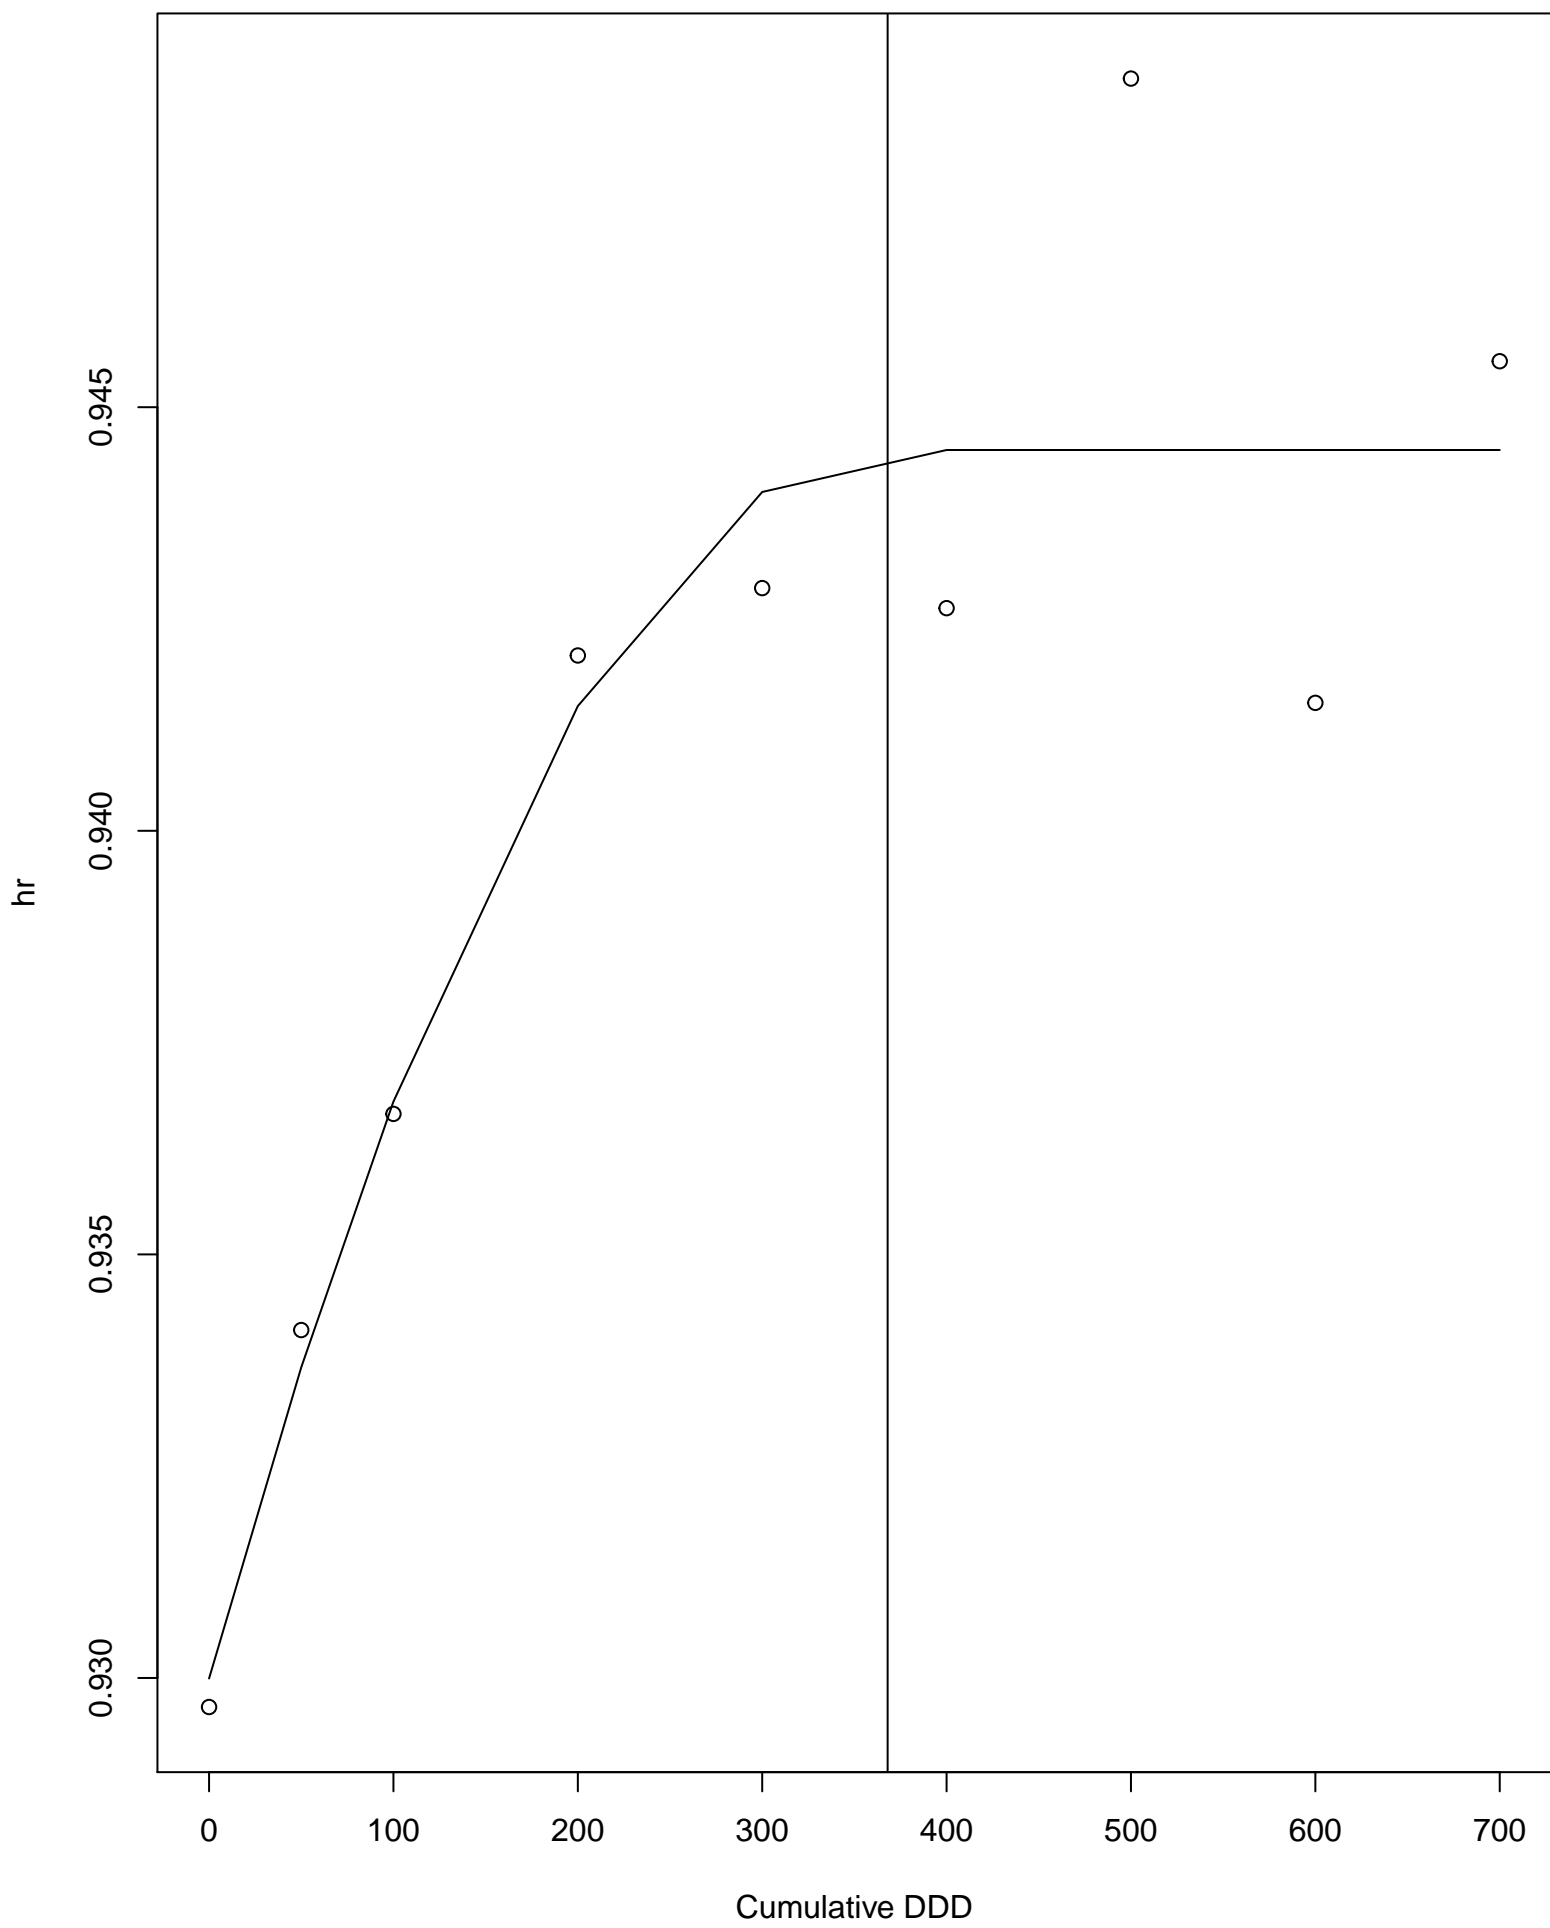

Supplement: MOESM2 [file 16393008]
